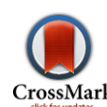

# Reputation and Competition in a Hidden Action Model

Alessandro Fedele<sup>1\*</sup>, Piero Tedeschi<sup>2</sup>

<sup>1</sup> School of Economics and Management, Free University of Bozen/Bolzano, Bozen/Bolzano, Italy, <sup>2</sup> Department of Economics and Finance, Università Cattolica del Sacro Cuore, Milan, Italy

## Abstract

The economics models of reputation and quality in markets can be classified in three categories. (i) Pure hidden action, where only one type of seller is present who can provide goods of different quality. (ii) Pure hidden information, where sellers of different types have no control over product quality. (iii) Mixed frameworks, which include both hidden action and hidden information. In this paper we develop a pure hidden action model of reputation and Bertrand competition, where consumers and firms interact repeatedly in a market with free entry. The price of the good produced by the firms is contractible, whilst the quality is noncontractible, hence it is promised by the firms when a contract is signed. Consumers infer future quality from all available information, *i.e.*, both from what they know about past quality and from current prices. According to early contributions, competition should make reputation unable to induce the production of high-quality goods. We provide a simple solution to this problem by showing that high quality levels are sustained as an outcome of a stationary symmetric equilibrium.

**Citation:** Fedele A, Tedeschi P (2014) Reputation and Competition in a Hidden Action Model. PLoS ONE 9(10): e110233. doi:10.1371/journal.pone.0110233

**Editor:** Zhen Wang, Center of nonlinear, China

**Received:** April 13, 2014; **Accepted:** September 15, 2014; **Published:** October 17, 2014

**Copyright:** © 2014 Fedele, Tedeschi. This is an open-access article distributed under the terms of the Creative Commons Attribution License, which permits unrestricted use, distribution, and reproduction in any medium, provided the original author and source are credited.

**Data Availability:** The authors confirm that all data underlying the findings are fully available without restriction. All relevant data are within the paper.

**Funding:** AF and PT: Progetti di ricerca di interesse nazionale (PRIN) 2007, (Protocollo 2007R5PN7Y). AF: School of Economics and Management, Free University of Bozen/Bolzano, research project "Competition, credit, taxation, and motivation (WW501R)". PT: PRIN 2005 (Protocollo 2005137858\_001) URL: <http://prin.miur.it/index.php?pag=2007>. The funders had no role in study design, data collection and analysis, decision to publish, or preparation of the manuscript.

**Competing Interests:** The authors have declared that no competing interests exist.

\* Email: [alessandro.fedele@unibz.it](mailto:alessandro.fedele@unibz.it)

## Introduction

A high-quality product's reputation is a crucial aspect when quality is hard to measure. In this paper we develop a pure hidden action model of reputation, where only one type of seller is present in the market who can provide goods of different quality [1]. As mentioned in the abstract, consumers and symmetric competitive firms interact repeatedly and entry is free. The price of the good produced by firms is contractible. By contrast, quality is noncontractible, hence it is just promised by firms when contracts are signed.

Firms' incentive not to cheat, *i.e.*, not to produce a lower-than-promised quality level, is based on the following mechanism. Cheating entails the expected cost of losing market share in the future due to the existence of a signal about quality. The signal is imperfect and public in that either all consumers receive it with some probability, or nobody detects cheating. Put differently, clients are generally not able to discover a firm's opportunistic behavior because of imperfect observability of quality. Yet if someone observes low quality, this piece of information becomes public through, *e.g.*, word of mouth communication, specialized publications, forums and discussion groups on internet. The Ebay system of feedbacks, *i.e.*, the ex-post evaluation of sellers (and buyers) made by the counterpart, is a real-world example of the public signal we have in mind; Tripadvisor is another one. Consumers do not repeat the purchase after receiving the signal. Furthermore, they can anticipate whether a given combination price-quality is incentive compatible, *i.e.*, such that firms find it profitable not to cheat. This amounts to say that consumers infer future quality from all available information, *i.e.*, both from what

they know about past quality (the probability of receiving the public signal) and from the observation of current contracts (the agreed-upon price and the promised quality of the good).

We find a stationary Bertrand equilibrium where firms end up with positive profits and provide high-quality goods. High quality is intended as a level strictly above a minimum possible level. In turn, the minimum can be referred to as a level below which under-provision of quality can be easily verified by a Court. Profits are positive because the firms' incentive compatibility (IC henceforth) constraint commands the so-called quality premium, without which firms would produce minimum-quality goods. Finally, we generalize the analysis by verifying that our findings are robust to three extensions of our framework.

## Related literature on reputation

The literature on reputation follows two related, but distinct, strands. One studies the social role of reputation and its relationship with cooperation, trust, and trustworthiness [2]. Some of the most recent results can be found in [3] and in the literature quoted therein. Our paper deals with the other stream of literature, reputation in markets, whose aim is to study the effect of reputation on concentration, entry, prices, and, especially, service and product quality. To the best of our knowledge, no other paper found a stationary Bertrand equilibrium with high quality and positive profits in a pure hidden action model, where entry is free, firms do not collude, and consumers evaluate noncontractible quality from all available information.

Seminal research showed that in on-going relationships clients can react to a monopolistic firm's choice of providing low quality by not repeating their purchase [4]. This reaction constitutes a

punishment for the firm because providing high quality commands positive profits, as in our framework. Later contributions extended the analysis to a competitive setup and proved that the quality premium is just sufficient to cover the higher costs of quality [5,6]. As a result, firms end up with zero profits. The mechanism in [5] is as follows. Consumers are supposed to infer future quality only from the observation of past levels and to underestimate quality of new goods. Accordingly, new firms are obliged to sell high-quality products at less than cost in order to gain market share. This initial investment in reputation is just compensated by a future flow of positive profits representing the quality premium.

Interestingly, this mechanism would disappear if consumers inferred future quality also from current prices. Suppose a new firm tries to gain market share by adopting the following non-stationary strategy. It reduces quality and the short-run price of its product so that consumers are better-off compared with the competitors' offers. At the same time, the firm sets the future price in such a way that the quality premium is preserved along with its long-run incentive to produce an above-minimum quality. In this way, consumers are convinced about the high quality of the good. The short-term undercutting strategy is profitable since the firm is able to gain market share and, at the same time, preserve the future quality premium. This reasoning leads to the famous objection raised by Joseph Stiglitz [7]. Competition with free entry should eliminate any quality premium, making reputation unable to induce the production of high-quality goods.

This side-effect of competition does not occur in our equilibrium. Indeed, any undercutting strategy (lower price given the equilibrium quality, or greater quality given the equilibrium price) leads to a market share reduction, rather than increase, because consumers anticipate a violation of the firms' IC constraint. As a result, such a strategy is not profitable.

One solution to Stiglitz's objection came from a more recent contribution, which relies upon a mixed (both hidden action and hidden information) model with good and bad firms [8]. Good firms have a technological advantage in producing high quality. Quality is also affected by firms' effort choice and some randomness in a repeated market interaction. At equilibrium all firms who under-performed in quality are kicked out of the market, good firms are induced to invest in quality to avoid being pushed out of the market and profits might be positive. Reputation is thus valuable.

The Stiglitz's problem appears to be particularly severe in pure hidden action frameworks, unless consumers' beliefs on quality are conditioned only to past levels, [9,10]. Indeed, in the absence of collusion, firms are shown to gain by cutting prices when beliefs are conditioned not only to past quality but also to current prices [11]. This confirms Stiglitz's objection. The result of high quality with "perfectly rational" beliefs is obtained when high costs of changing suppliers are imposed, which are instead absent in our framework [12]. By introducing the possibility of collusion among firms, an oligopolistic market structure is shown to sustain high quality, since firms are punished by rivals when lowering price and by consumers when cutting quality [13]. By contrast, high quality can be sustained in markets where the degree of product substitutability is either very low or very high, when a model with both vertical and horizontal differentiation is considered [14].

## Materials and Methods

No materials have been used to conceive and write this paper. The only method consists in mathematical analysis to solve a theoretical economic model, whose basic features are as follows. We consider an economy with a continuum of consumers of

measure one and  $n \geq 2$  symmetric firms that provide a good. Each consumer buys at most one unit of the good, in which case she is characterized by the following utility function,

$$u \equiv q_i - p_i, \quad (1)$$

where  $q_i$  and  $p_i \geq 0$  are quality level and price, respectively, of the good supplied by firm  $i = 1, \dots, n$ . We let  $q_i \geq \underline{q} \geq 0$ , where  $\underline{q}$  denotes the minimum possible level of quality; as mentioned, one can think of a level below which under-provision of quality can be easily verified by a Court.

Firm  $i$  is characterized by the following profit function,

$$\Pi_i \equiv \sigma_i [p_i - c(q_i)], \quad (2)$$

where  $\sigma_i < 1$  denotes the fraction of consumers served by firm  $i$  and  $c(q_i)$  the unit cost of quality  $q_i$ , with  $c(q_i)$  twice differentiable,  $c' > 0$ , and  $c'' > 0$ .

## Results

Consumers and firms play the following one-shot competition game: (i) firms compete à la Bertrand by making simultaneous offers of  $q$  and  $p$ ; (ii) each consumer either selects the preferred contract or refuses to purchase; (iii) the accepted contracts are implemented.

### Contractible Quality

Suppose that quality  $q_i$  is contractible. We first solve the following problem: a representative consumer maximizes her utility  $u$  subject to firm  $i$ 's participation constraint  $\Pi_i \geq 0$ . We then show that the equilibrium contract of the one-shot competition game is given by the solution to the above problem.

Before proceeding we define the sum of a consumer's utility plus firm  $i$ 's profit on a single contract,

$$W_i \equiv (q_i - p_i) + [p_i - c(q_i)] = q_i - c(q_i), \quad (3)$$

as the welfare generated by each contract proposed by firm  $i$ . The level of quality that maximizes  $W_i$  is referred to as efficient.

### Lemma 1

*The equilibrium contract  $\{q_{FB}, p_{FB}\}$  when quality is contractible has the following features: (i) firms get zero profits; (ii) the level of quality is efficient; (iii) consumers accept the contract. In symbols:*

$$\begin{cases} p_{FB} = c(q_{FB}), \\ c'(q_{FB}) = 1. \end{cases} \quad (4)$$

### Proof

Contract (4) is the solution to the following problem:

$$\begin{aligned} & \max_{q_i, p_i} \{q_i - p_i\} \\ & \text{s.t. } \sigma_i [p_i - c(q_i)] \geq 0. \end{aligned} \quad (5)$$

The Lagrangian is

$$q_i - p_i + \lambda \sigma_i [p_i - c(q_i)]. \quad (6)$$

The first order conditions with respect to  $q_i$  and  $p_i$  are

$$\begin{aligned} \frac{\partial}{\partial q_i} &= 0 \Leftrightarrow \lambda \sigma_i c'(q_i) = 1, \\ \frac{\partial}{\partial p_i} &= 0 \Leftrightarrow \lambda = \frac{1}{\sigma_i}. \end{aligned} \quad (7)$$

The constraint is hence binding at the optimum. Substituting  $\lambda = \frac{1}{\sigma_i}$  into  $\lambda \sigma_i c'(q_i) = 1$  yields the result.

To prove that the (4) is the equilibrium contract when firms compete à la Bertrand and  $q$  is contractible, it is sufficient to invoke a Bertrand undercutting argument. ■

### Noncontractible Quality

We now relax the assumption of quality contractibility. This means that the contracts cannot be conditioned on  $q_i$ . Since firm  $i$ 's profits,  $\Pi_i$ , are decreasing in  $c(q_i)$ , and therefore in  $q_i$ , firm  $i$  has an incentive to supply the minimum level of quality,  $\underline{q}$ , when implementing a contract  $\{q_i, p_i\}$ .

We replicate the analysis of Lemma 1 by studying the above-described one-shot competition game under the assumption, however, that quality is noncontractible.

### Lemma 2

*The equilibrium contract  $\{\underline{q}, \underline{p}\}$  when quality is noncontractible has the following features: (i) firms get zero profits; (ii) the level of quality is minimal; (iii) consumers accept the contract. In symbols:*

$$\begin{cases} \underline{p} = c(\underline{q}), \\ q = \underline{q}. \end{cases} \quad (8)$$

### Proof

The optimal contract is the solution to the following problem:

$$\begin{aligned} \max_{p_i} \{ & q_i - p_i \} \\ \text{s.t. } & \sigma_i [p_i - c(q_i)] \geq 0 \text{ and } q_i = \underline{q}. \end{aligned} \quad (9)$$

Plugging  $q_i = \underline{q}$  in the objective function yields  $\underline{q} - p_i$ , which is decreasing in  $p_i$ . The constraint is therefore binding. Solving  $\sigma_i [p_i - c(q_i)] = 0$  for  $q_i = \underline{q}$  yields the result.

To prove that the (8) is the equilibrium contract when firms compete à la Bertrand and  $q$  is noncontractible, it is sufficient to invoke a Bertrand undercutting argument. ■

We let  $c'(\underline{q}) \rightarrow 0$ , so that  $\underline{q} < q_{FB}$  and contract  $\{\underline{q}, \underline{p}\}$  in (8) is not efficient, i.e., it does not maximize the welfare generated by each single contract. We can conclude that the equilibrium contract when quality is noncontractible entails unexploited gains from trade.

### Reputation

We investigate whether reputation helps mitigate the issue of unexploited gains from trade due to quality noncontractibility. To this aim, we abandon the one-shot competition game described at the beginning of this section to consider a repeated interaction among infinitely lived consumers and firms. We assume that quality is observed by consumers when they receive a public signal, which we describe below. We first study the contracting problem between a representative firm and its customers. In order to provide an appropriate benchmark for the subsequent analysis of competition, consumers are assumed to have full bargaining power. This is the same hypothesis behind the proofs of Lemmas 1 and 2.

The fraction of consumers served by firm  $i$  at time  $t = 0, \dots, \infty$  is denoted with  $\sigma_{i,t}$ . In each period  $t \geq 0$ , the contracting between firm  $i$  and its customers takes place according to the following timing:

- (i) a representative consumer offers a contract  $\{q_{i,t}, p_{i,t}\}$  to firm  $i$ ;
- (ii) firm  $i$  either accepts the contract or refuses it; quality  $q_t$  is noncontractible, hence it is promised by firms;
- (iii) firm  $i$  selects a quality level  $q_{i,t}^A$  for each consumer, where superscript  $A$  stands for actual; we denote with  $\tau_{i,t}$  the share of consumers who enjoy a quality level lower than the promised level,  $q_{i,t}^A < q_{i,t}$ , that is, cheated consumers;
- (iv) Nature selects the following public signal: with probability  $\alpha(\tau_{i,t}, \sigma_{i,t})$  all consumers receive a signal of bad quality; with probability  $1 - \alpha(\tau_{i,t}, \sigma_{i,t})$  no consumer receives the signal;
- (v) if consumers receive a signal of bad quality, they know that firm  $i$  cheated somebody; they then decide whether to buy again from firm  $i$  or not.

The above timing depicts a moral hazard model, where the hidden action is the actual level of quality provided by firm  $i$  after the contract is signed.

We introduce the following restrictions on the public signal probability  $\alpha$ :

### Assumption 1

$$\alpha(0, \sigma_{i,t}) = 0.$$

### Assumption 2

$\alpha_\tau(\tau_{i,t}, \sigma_{i,t}) > 0$  and  $\alpha_{\sigma\sigma}(\tau_{i,t}, \sigma_{i,t}) \geq 0$ , where the subscripts of  $\alpha$  denote partial derivatives.

### Assumption 3

$$\alpha_{\tau\sigma}(\tau_{i,t}, \sigma_{i,t}) > 0.$$

According to Assumption 1 no signal is conveyed if firm  $i$  cheats no consumer, that is, we rule out the possibility that non-cheated consumers send a signal of bad quality. This hypothesis is quite reasonable. However, there may be real-world situations in which false and/or erroneous signals of bad quality are conveyed. An

example of false signals is given by the case of Ebay. Evidence was found that (negative) feedbacks were used to threaten the counterpart with the aim of obtaining better contractual conditions. To take this aspect on board, in Section "Discussion" we relax Assumption 1 by introducing an alternative public signal probability  $\phi(\tau_{i,t}, \sigma_{i,t})$ , with  $\phi(0, \sigma_{i,t}) > 0$ .

Assumption 2 simply states that probability  $\alpha$  is increasing and nonconcave in the fraction  $\tau$  of cheated consumers.

The meaning of Assumption 3 is as follows. If firm  $i$  decides to cheat an additional fraction of consumers, that is, to increase  $\tau_i$  the probability that all consumers receive the signal increases since  $\alpha_\tau(\tau_i, \sigma_i) > 0$ . Such a variation, in turn, rises with the market share because  $\alpha_{\tau\sigma}(\tau_i, \sigma_i) > 0$ . Put differently, information regarding bigger firms is supposed to propagate at a faster rate. There exists indirect evidence of the validity of our assumption in finance and management literature, where information on the accounts of big firms is thought to circulate before its disclosure [15,16]. This may mean that big firms are subject to closer scrutiny than smaller ones on the side of the public, although we cannot exclude alternative explanations, such as the strategic use of information leaks. There is also evidence that the number of analysts following big firms is typically higher [17]. This implies that privately gathered information about big firms is likely to be more abundant. In addition, there are theoretical contributions which show that both information and word of mouth reputation are more valuable for big firms [18,12]. We finally mention a survey on the role of risk managers in protecting corporate reputation [19]. Evidence is found that bigger companies undertake more reputational risk management activities, perhaps reflecting a greater consideration for the value of reputation.

Obviously, we cannot exclude opposite situations where information regarding bigger firms circulates at a slower rate. To take into account this scenario, in Section "Discussion" we relax Assumption 3 by introducing an alternative public signal probability  $\eta(\tau_i, \sigma_i)$ , with  $\eta_{\tau\sigma}(\tau_i, \sigma_i) < 0$ .

At time  $t$  the discounted value of firm  $i$ 's profit is

$$V_{i,t} \equiv \sigma_{i,t} \left[ p_{i,t} - (1 - \tau_{i,t})c(q_{i,t}) - \tau_{i,t}c(q_{i,t}^A) \right] + \delta[1 - \alpha(\tau_{i,t}, \sigma_{i,t})]V_{i,t+1}, \quad (10)$$

where  $\delta \in (0,1)$  is the discount factor. When cheating  $\tau_{i,t}\sigma_{i,t}$  consumers at any time  $t \geq 0$ , firm  $i$  saves the amount  $\tau_{i,t}\sigma_{i,t}[c(q_{i,t}) - c(q_{i,t}^A)]$ , but incurs the expected loss  $\alpha(\tau_{i,t}, \sigma_{i,t})V_{i,t+1}$  of future profits, provided that no consumer repeats the purchase when receiving the signal of bad quality. Point 5 of Proposition 1 below shows this is the consumers' equilibrium behavior.

As one can see by inspecting (10) the choice of  $(p_{i,t}, q_{i,t})$  affects  $V_{i,t}$  but not  $V_{i,t+1}$ . Only  $\tau_{i,t}$  has a dynamic effect on firm  $i$ 's profits. However,  $V_{i,t}$  turns out to have a stationary structure, i.e.,  $V_{i,t} = V_{i,t+1}$  for all  $t$ , if problem  $\max_{\tau_{i,t}} V_{i,t}$  has a stationary solution, that is,  $\tau_{i,t} = \tau_i$  for all  $t$ . This is the case because in Lemma 3 below we compute the conditions for which firms find it profitable not to cheat any customer; in symbols,  $\tau_{i,t} = 0$  for any firm  $i$  at any time  $t$ .

### Lemma 3

*In a stationary strategy and for any given market share  $\sigma_i$ , firm  $i$  decides not to cheat any consumers if and only if its profits on each contract are relatively high. In symbols,*

$$p_i - c(q_i) \geq \underline{\Pi}_i \equiv \frac{(1 - \delta)[c(q_i) - c(\underline{q})]}{\delta\alpha_\tau(0, \sigma_i)}. \quad (11)$$

### Proof

Expression (10) decreases with  $c(q_{i,t}^A)$ , hence the optimal deviation is setting  $q_{i,t}^A = \underline{q}$ , in which case  $V_{i,t}$  can be rewritten as

$$V_{i,t} \equiv \sigma_{i,t} \left\{ p_{i,t} - c(q_{i,t}) + \tau_{i,t} [c(q_{i,t}) - c(\underline{q})] \right\} + \delta[1 - \alpha(\tau_{i,t}, \sigma_{i,t})]V_{i,t+1}. \quad (12)$$

Note that

$$\frac{\partial^2 V_{i,t}}{\partial \tau_{i,t}^2} = -\delta\alpha_{\tau\tau}(\tau_{i,t}, \sigma_{i,t})V_{i,t+1} \leq 0 \quad (13)$$

according to Assumption 2. As a consequence, firm  $i$  will not cheat if and only if

$$\frac{\partial V_{i,t}}{\partial \tau_{i,t}} = \sigma_{i,t} [c(q_{i,t}) - c(\underline{q})] - \delta\alpha_\tau(\tau_{i,t}, \sigma_{i,t})V_{i,t+1} \leq 0 \quad (14)$$

at  $\tau = 0$ . We assume that our dynamic model is stationary,  $V_{i,t} = V_{i,t+1}$ , and we then check that a stationary solution is admissible. Putting  $V_{i,t} = V_{i,t+1}$  with  $\tau = 0$  in (12), recalling that  $\alpha(0, \sigma_i) = 0$  under Assumption 1, and omitting subscript  $t$  yields

$$V_i = \sigma_i \frac{p_i - c(q_i)}{1 - \delta}. \quad (15)$$

Plugging the above value of  $V_i$  into (14) yields

$$\sigma_i [c(q_i) - c(\underline{q})] - \delta\alpha_\tau(0, \sigma_i)\sigma_i \frac{p_i - c(q_i)}{1 - \delta} \leq 0. \quad (16)$$

Rearranging gives (11). ■

Condition (11) defines the firms' incentive compatibility (IC) constraint, which states that firms must make positive profits on each contract in order not to cheat any consumer. If profits were nought there would be no quality premium, hence no fear of foregoing future profits. In that case, firms would not be induced to behave. To illustrate the IC constraint (11) we rewrite it as

$$\alpha_\tau(0, \sigma_i) \frac{\delta}{1 - \delta} [p_i - c(q_i)] \geq c(q_i) - c(\underline{q}). \quad (17)$$

The left hand side of (17) denotes the long-run expected loss of cheating an additional consumer when  $\tau_i = 0$ : the increase in the probability that firm  $i$  is detected is  $\alpha_\tau(0, \sigma_i)$ , in which case it loses the per-contract profits in all future periods,  $\frac{\delta}{1 - \delta} [p_i - c(q_i)]$ . The right hand side of (17) denotes the short-run gain of cheating, due to the fact that firm  $i$  produces the minimum quality  $\underline{q}$  instead of

$q_i$ . The expected loss of cheating is larger than the gain when (17) is fulfilled, in which case firm  $i$  finds it profitable not to cheat any clients.

We are now able to compute the optimal contract with reputation as a solution to the following problem. Since the model is stationary, a representative consumer selects  $p_i$  and  $q_i$  to maximize her single-period utility  $u$  subject to firm  $i$ 's IC constraint. Note that the IC constraint implies positive profits for firm  $i$  and assures its participation.

#### Lemma 4

The optimal stationary contract with reputation when quality is noncontractible,  $\{q_r, p_r\}$ , has the following features: (i) the IC constraint (11) is binding, hence firms get positive profits; (ii) the level of quality  $q_r$  belongs to interval  $(\underline{q}, q_{FB})$ ; (iii) consumers accept the contract. In symbols:

$$\begin{cases} p_r = \kappa(\sigma_i) [c(q_r) - c(\underline{q})] + c(\underline{q}), \\ c'(q_r) = \frac{1}{\kappa(\sigma_i)}, \end{cases} \quad (18)$$

where  $\kappa(\sigma_i) \equiv 1 + \frac{1-\delta}{\delta \alpha_\tau(0, \sigma_i)} > 1$  and  $q_r \in (\underline{q}, q_{FB})$ .

#### Proof

The problem to be solved is:

$$\begin{aligned} \max_{p, q} \{q_i - p_i\} \quad \text{s.t.} \quad & \delta [p_i - c(q_i)] \alpha_\tau(0, \sigma_i) - \\ & (1-\delta) [c(q_i) - c(\underline{q})] \geq 0, \end{aligned} \quad (19)$$

where the constraint is (11) after rearrangement. The Lagrangian is

$$q_i - p_i + \mu \left\{ \delta [p_i - c(q_i)] \alpha_\tau(0, \sigma_i) - (1-\delta) [c(q_i) - c(\underline{q})] \right\}. \quad (20)$$

The first order conditions with respect to  $q_i$  and  $p_i$  are:

$$\frac{\partial}{\partial q_i} = 1 - \mu \delta \alpha_\tau(0, \sigma_i) c'(q_i) - \mu (1-\delta) c'(q_i) = 0 \quad (21)$$

and

$$\frac{\partial}{\partial p_i} = -1 + \mu \delta \alpha_\tau(0, \sigma_i) = 0. \quad (22)$$

The constraint is binding at the optimum. Substituting (22) into (21) and rearranging yields

$$c'(q_r) = \frac{1}{1 + \frac{1-\delta}{\delta \alpha_\tau(0, \sigma_i)}}. \quad (23)$$

Note that

$$\frac{1}{1 + \frac{1-\delta}{\delta \alpha_\tau(0, \sigma_i)}} < 1, \quad (24)$$

hence  $c'(q_r) < c'(q_{FB})$ , which implies  $q_r < q_{FB}$ . Finally,  $q_r > \underline{q}$  because  $c'(q_r) > c'(\underline{q}) \rightarrow 0$ . Solving the binding constraint for  $p$  yields  $p_r$ . ■

Recall that welfare (3) is maximum at  $q_{FB}$  and, given its strict concavity due to  $c' > 0$  and  $c'' > 0$ , increasing in  $q \in (\underline{q}, q_{FB})$ . Since  $q_r \in (\underline{q}, q_{FB})$ , the welfare is larger under contract (18) than contract (8): reputation mitigates the problem of unexploited gains from trade due to quality noncontractibility.

Finally, we investigate the relation between the quality level and the market share  $\sigma_i$  at the optimum described by (18).

#### Lemma 5

Quality level  $q_r$  increases with market share  $\sigma_i$ .

#### Proof

The second equation of (18) implies that

$$\text{sign} \left[ \frac{\partial c(q_r)}{\partial \sigma_i} \right] = -\text{sign} \left( \frac{\partial \kappa}{\partial \sigma_i} \right). \quad (25)$$

In turn  $\frac{\partial \kappa}{\partial \sigma_i} = -\frac{1-\delta}{\delta} \frac{\alpha_{\tau\sigma}(0, \sigma_i)}{[\alpha_\tau(0, \sigma_i)]^2}$ , which is negative under Assumption 3. As a result,  $\text{sign} \left[ \frac{\partial c(q_r)}{\partial \sigma_i} \right] > 0$  and, given  $c'(q) > 0$ ,  $\text{sign} \left( \frac{\partial q_r}{\partial \sigma_i} \right) > 0$ . ■

The result of Lemma 5 relies upon Assumption 3, according to which firms with greater market share are more easily discovered after cheating. As a consequence, they are also more credible when offering higher quality.

We now turn to the investigation of the strategic interaction among firms and consumers. We study the following infinitely repeated game with free entry:

- firms decide whether to enter the market;
- firms compete à la Bertrand on  $p_i$  and  $q_i$  (recall that the level of quality  $q_i$  is promised by firms);
- consumers either select the preferred contract or do not purchase;
- firms select an actual level of quality for each consumer;
- Nature selects the public signal;
- the game starts again from stage (a).

We solve the game by focusing on symmetric Perfect Public Equilibria (PPEs, henceforth) in pure strategies. Symmetry means that all firms have the same market share. This implies that  $\sigma_i = \frac{1}{n}$ .

Before proceeding we introduce the following

### Definition 1

Quality level  $\bar{q} \in \left( \underline{q}, q_r \left( \frac{1}{2} \right) \right]$  is a minimum socially accepted quality standard, where  $q_r \left( \frac{1}{2} \right)$  denotes the quality level computed in Lemma 5 when just two symmetric firms are active in the market, that is,  $\sigma_i = \frac{1}{2}$ ,  $i = 1, 2$ .

It seems reasonable to suppose the existence of a social convention on acceptable quality above the minimum  $\underline{q}$ . For instance, market shares of online insurance companies experienced very little growth in many economies since their appearance [20]. Given that online companies generally offer lower quality than traditional competitors, their poor performance may be due to the existence of a social convention on the quality of insurance policies, which prevents many potential customers from buying policies online.

We state the following

### Proposition 1

There exists a PPE of the infinitely repeated game described above with the following features:

1. the equilibrium number of firms is

$$n_{SB} = \max \left\{ n : q_r \left( \frac{1}{n} \right) \geq \bar{q} \right\}, \quad (26)$$

where  $q_r \left( \frac{1}{n} \right)$  is the equilibrium quality determined in (27);

2. on the equilibrium path all firms offer contract  $\{q_{SB}, p_{SB}\}$  characterized by:

$$\begin{cases} p_{SB} = \kappa \left( \frac{1}{n_{SB}} \right) [c(q_{SB}) - c(\underline{q})] + c(\underline{q}), \\ c'(q_{SB}) = \frac{1}{\kappa \left( \frac{1}{n_{SB}} \right)}; \end{cases} \quad (27)$$

3. off the equilibrium path, that is if  $n > n_{SB}$ , all firms offer contract  $\{\underline{q}, \underline{p}\}$  of Lemma 2;

4. consumers accept contract  $\{q_{SB}, p_{SB}\}$  if  $n \leq n_{SB}$ , and accept contract  $\{\underline{q}, \underline{p}\}$  if  $n > n_{SB}$ ; they refuse any other contract;

5. consumers refuse any contract from firm  $i$  after receiving the public signal, in which case firm  $i$  exits the market.

### Proof

(i) Point 5. According to the equilibrium strategy consumers do not buy upon receiving the public signal from firm  $i$ . Each consumer expects then all the other clients not to buy from firm  $i$  and anticipates that firm  $i$ 's market share will tend to zero. As a result, each consumer also anticipates that a poor quality level will be actually supplied by firm  $i$ . In symbols, if  $\sigma_i \rightarrow 0$ ,  $\kappa(\sigma_i) \equiv 1 + \frac{1-\delta}{\delta \alpha_\tau(0, \sigma_i)}$ , computed in Lemma 4, becomes large because  $\alpha_\tau$  becomes small under Assumption 3. In that case,  $c'(q_r)$  in (18) tends to zero, hence  $q_r \rightarrow \underline{q}$  given that  $c'(\underline{q}) \rightarrow 0$ .

Consumers prefer thus to buy from another firm and firm  $i$  is forced to exit the market.

(ii) Point 4. First focus on the case  $n \leq n_{SB}$ . Contract  $\{q_{SB}, p_{SB}\}$  in (27) satisfies with the equality the IC constraint (11), hence consumers accept it since they get the maximum utility. To prove it, note that two possible deviations are available to any firm  $i$ : offering a contract with either (a) better or (b) worse conditions or the clients. Yet in case (a) the IC constraint is violated. In case (b) consumers simply refuse to buy.

Consider now the case  $n > n_{SB}$ . If all firms offer contract  $\{\underline{q}, \underline{p}\}$  in (8), the clients accept it since it is the maximum they can get when quality is bounded to  $\underline{q}$ . Again, two possible deviations are available to any firm  $i$ . If a contract with better conditions for the clients is proposed by firm  $i$ , its participation constraint is violated. If a contract with worse conditions is proposed by firm  $i$ , consumers simply refuse to buy.

(iii) Point 3. To prove that in each period  $t \geq 0$  contract  $\{\underline{q}, \underline{p}\}$  is an equilibrium contract when  $n_{SB} < n$ , recall that firms make zero profits under this contract. The reasoning of Point 4 proves that any other contract would be refused by consumers, hence firms would make zero profits as well. We conclude that there is no strictly profitable deviation.

(iv) Point 2. To prove that in each period  $t \geq 0$  contract  $\{q_{SB}, p_{SB}\}$  is an equilibrium contract for any  $n_{SB} \geq n \geq 2$ , recall that such a contract satisfies the IC constraint (11) with equality. If all firms offer it, consumers accept and firms get  $\Pi > 0$  on each contract stipulated at each time  $t$ . The reasoning of Point 4 proves that any other contract would be refused by consumers, hence there is no profitable deviation.

(v) Point 1. Suppose first  $n < n_{SB}$  firms enter with  $q_r \left( \frac{1}{n+1} \right) > \bar{q}$ .

According to Lemma 5 at least an additional firm can enter and offer the following contract

$$\begin{cases} p_{SB} = \kappa \left( \frac{1}{n+1} \right) [c(q_{SB}) - c(\underline{q})] + c(\underline{q}), \\ c'(q_{SB}) = \frac{1}{\kappa \left( \frac{1}{n+1} \right)}; \end{cases} \quad (28)$$

Such an offer would be accepted given (29), hence the entrant would end up with positive profits. We conclude that  $n < n_{SB}$  cannot be an equilibrium of the initial entry stage.

Now suppose  $n > n_{SB}$  firms enter. This implies  $q_r \left( \frac{1}{n} \right) < \bar{q}$  given Lemma 5, hence consumers predict that the market share of any firm offering a contract with  $q_r \left( \frac{1}{n} \right)$  will be zero. This is because of

the consumers' beliefs (29), according to which no consumer would accept a contract with quality lower than the socially accepted quality standard  $\bar{q}$ . Following the reasoning of Point 5, any consumer knows then that only contracts promising minimum quality  $\underline{q}$  are incentive compatible for firms with zero market share. As a result, firms compete à la Bertrand by offering contracts with  $q = \underline{q}$ , in which case they make zero profits as stated by Lemma 2. Therefore, entry when  $n > n_{SB}$  is not a strictly profitable strategy for outside firms.

We conclude that the equilibrium number of firms is  $n = n_{SB}$ . ■

We remark that the equilibrium contract (27) is driven by consumers' beliefs, an example of which is given by

$$\text{Probability (firm } i \text{ cheats} | p_i, q_i, \sigma_i) = \begin{cases} 0 & \text{if } p_i - c(q_i) \geq \underline{p}_i \text{ and } q_i \geq \bar{q} \\ 1 & \text{if } p_i - c(q_i) < \underline{p}_i \text{ and/or } q_i < \bar{q} \end{cases} \quad (29)$$

According to (29), consumers anticipate that firm  $i$  will not cheat when offering  $(p_i, q_i)$  if the contract satisfies the IC constraint (11) for any given  $\sigma_i$  and if the promised level of quality is nonlower than the socially accepted quality standard  $\bar{q}$ . On the contrary, if (11) is not satisfied and/or firm  $i$  offers less than  $\bar{q}$ , consumers believe that firm  $i$  wants to cheat all of them. Such behavior on the part of consumers can be explained as follows.

Suppose at the equilibrium a firm decide to offer  $\{q, p_{SB}\}$  with  $q > q_{SB}$ . In this case its IC constraint is violated, hence consumers correctly anticipate that they will be cheated. Alternatively, suppose the firm offers  $\{q, p_{SB}\}$  with  $q < \bar{q} (\leq q_{SB})$ . In this case the firm's IC constraint is fulfilled. Yet if any other competitor is fulfilling the socially accepted quality standard by offering  $\{q_{SB}, p_{SB}\}$ , each individual consumer, in conformity with the equilibrium strategy, point 1 of Proposition 1, expects that none of the current clients will accept the contract proposed by firm  $i$ . She thus anticipates that firm  $i$ 's market share will go to zero. In that case, Lemma 5 ensures that a poor quality level will be actually supplied by firm  $i$ . In symbols, if  $\sigma_i \rightarrow 0$ ,  $\kappa(\sigma_i) \equiv 1 + \frac{1-\delta}{\delta \alpha_\tau(0, \sigma_i)}$  in Lemma 4 becomes large because  $\alpha_\tau$  becomes small under Assumption 3. In that case,  $c'(q_r)$  in (18) tends to zero, hence  $q_r \rightarrow \underline{q}$  given that  $c'(\underline{q}) \rightarrow 0$ . By anticipating this scenario, each consumer finds it rational to turn to any other competitor who offers  $\{q_{SB}, p_{SB}\}$ . This reasoning clarifies why the social convention is fulfilled at equilibrium, with the effect that high quality is provided by the competitive firms.

## Discussion

We discuss the two most important results of Proposition 1. Lemma 5 ensures that the optimal quality  $q_r$  decreases with the number of active competitors  $n$ . Therefore, firms enter the market until quality is non-lower than the acceptable standard  $\bar{q} \in \left( \underline{q}, q_r \left( \frac{1}{2} \right) \right]$ . Put differently, the equilibrium number of firms is finite; at least two firms are active in the market,  $n_{SB} \geq 2$ , given that  $\bar{q} \leq q_r \left( \frac{1}{2} \right)$ . Note that if we let  $\bar{q} > q_r \left( \frac{1}{2} \right)$ , there would be equilibria with either zero or only one firm entering the market. However, in the latter case, the equilibrium contract would be different from (27), because the firm would act as a monopolist.

As a consequence, (i) the equilibrium quality  $q_{SB}$  is higher than the minimum,  $q_{SB} \geq \bar{q} > \underline{q}$ , thanks to the social convention; (ii) the firms' IC constraint is binding at equilibrium, hence firms make positive profits on each contract,

$$\underline{p}_{SB} \equiv \frac{(1-\delta) [c(q_{SB}) - c(\underline{q})]}{\delta \alpha_\tau \left( 0, \frac{1}{n_{SB}} \right)}. \quad (30)$$

It is worth noting that the equilibrium described in Proposition 1 is not unique. Indeed, it hinges upon consumers' beliefs (29). These beliefs may obviously be built in different ways, which would give rise to different equilibria. Even focusing on beliefs (29), different equilibria are sustained depending on the value of  $\bar{q}$ .

In order to better understand our results, we consider explicit functional forms for the quality cost  $c(q_i)$  and the public signal probability  $\alpha(\tau_{i,t}, \sigma_{i,t})$ . We then provide numerical simulations by assigning opportune values to the relevant parameters.

We let  $c(q_i) = q_i^2$  and  $\alpha(\tau_{i,t}, \sigma_{i,t}) = \tau_{i,t} \times \sigma_{i,t}$ : note these two functions fit with all the properties specified in the text. In addition, we let  $\underline{q} = 0$ , so that  $c(\underline{q}) = c'(q) = 0$ . One can check that the equilibrium contract when quality is contractible, computed in Lemma 1, becomes

$$\{q_{FB}, p_{FB}\} = \{0.5, 0.25\}. \quad (31)$$

The equilibrium contract when quality is instead noncontractible, computed in Lemma 2, can be rewritten as

$$\{\underline{q}, \underline{p}\} = \{0, 0\}. \quad (32)$$

In turn, the IC constraint of Lemma 3 becomes

$$p_i - q_i^2 \geq \underline{p}_i \equiv \frac{(1-\delta)q_i^2}{\delta \sigma_i}. \quad (33)$$

Finally, the optimal stationary contract with reputation when quality is noncontractible, computed in Lemma 4, can be rewritten as

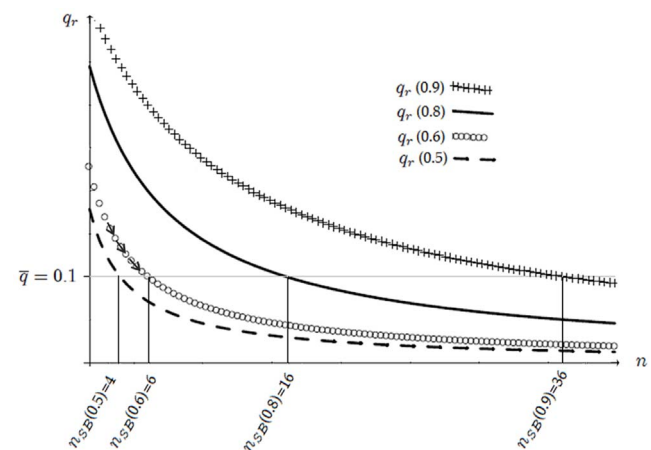

**Figure 1. Constrained optimal quality  $q_r(\delta)$  as a function of the number  $n$  of active firms.** Quality  $q_r(\delta)$  decreases for any  $\delta = 0.5, 0.6; 0.8; 0.9$  as new firms enter the market (as  $n$  increases). Entry is blocked when quality reaches the social standard,  $\bar{q} = 0.1$  in the graph. Focus, e.g., on  $q_r(0.6)$ , the constrained optimal quality when  $\delta = 0.6$ : only six firms can enter the market,  $n_{SB}(0.6) = 6$ , because a seventh competitor would supply lower quality than 0.1. doi:10.1371/journal.pone.0110233.g001



$$\{q_r, p_r\} = \left\{ \frac{1}{2} \frac{\delta \sigma_i}{1 - \delta(1 - \sigma_i)}, \frac{1}{4} \frac{\delta \sigma_i}{1 - \delta(1 - \sigma_i)} \right\}. \quad (34)$$

Recalling that all firms have the same market share at our symmetric equilibrium, *i.e.*,  $\sigma_i = \frac{1}{n}$ , we present in Figure 1 the constrained optimal quality,

$$q_r(\delta) = \frac{1}{2} \frac{\delta \frac{1}{n}}{1 - \delta \left(1 - \frac{1}{n}\right)}, \quad (35)$$

as a function of the number  $n$  of active firms. We consider four different values of the discount factor  $\delta \in (0, 1)$ ,  $\delta = 0.5; 0.6; 0.8; 0.9$ . Note that interval  $\left(q, q_r\left(\delta; \frac{1}{2}\right)\right]$ , introduced in Definition 1 to establish the range of values that the socially accepted quality standard  $\bar{q}$  can take, becomes  $\left(0, \frac{\delta}{2(2-\delta)}\right]$ , with  $\frac{\delta}{2(2-\delta)}$  increasing in  $\delta$ . More precisely, the upper bound  $\frac{\delta}{2(2-\delta)}$  is equal to 0.17; 0.21; 0.33; 0.41 for  $\delta = 0.5; 0.6; 0.8; 0.9$ , respectively. Accordingly, we let  $\bar{q}$  be equal to  $0.1 \in (0, 0.17]$ .

Figure 1 confirms that  $q_r(\delta)$  decreases with  $n$ , or, equivalently, increases with  $\sigma_i = \frac{1}{n}$ , as stated in Lemma 5. The negative relation between  $q_r$  and  $n$  holds true for any  $\delta$ . Following point 1 of Proposition 1 and recalling that  $\bar{q} = 0.1$ , we can state that the equilibrium number of firms is  $n_{SB} = \max \left\{ n : q_r\left(\delta; \frac{1}{n}\right) \geq 0.1 \right\}$ . We get  $n_{SB}(\delta) = 4; 6; 16; 36$  for  $\delta = 0.5; 0.6; 0.8; 0.9$ , respectively. The intuition for this result is as follows. Focus, *e.g.*, on  $\delta = 0.6$ . In that case, the equilibrium quality level would become strictly lower than the social standard  $\bar{q}$  if at least  $n = 7$  firms were active in the market. In symbols,  $q_r\left(0.6; \frac{1}{6}\right) = 0.1 = \bar{q} > q_r\left(0.6; \frac{1}{7}\right) = 0.09$ . Note also that  $q_r(\delta)$  increases with  $\delta$  for any given  $n$ . This is because a larger discount factor denotes a situation where the

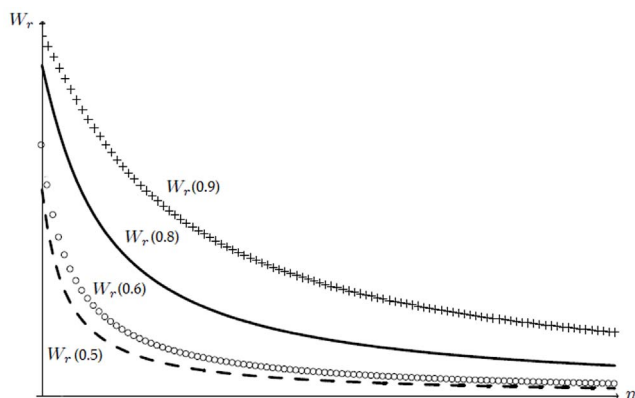

**Figure 2. Constrained optimal welfare  $W_r(\delta)$  as a function of the number  $n$  of active firms.** Welfare  $q_r(\delta)$  decreases for any  $\delta = 0.5, 0.6; 0.8; 0.9$  as new firms enter the market (as  $n$  increases) because decreasing quality is offered.  
doi:10.1371/journal.pone.0110233.g002

firms care increasingly about future profits. In this case, they are willing to offer higher quality because of the augmented cost of cheating clients. Consequently, more firms can enter the market as  $\delta$  augments.

The above analysis confirms that at the equilibrium described by Proposition 1, (i) the quality level is higher than the minimum,  $q_{SB}(\delta) = 0.1 > 0$ ; (ii) firms' per-contract profits are positive,  $\Pi_{SB}(\delta) = [n_{SB}(1 - \delta)q_{SB}^2]/\delta = \frac{1}{25}$ , given that the IC constraint (33) is binding. Finally, note that the equilibrium quality is always below the efficient level. In symbols,  $q_{SB}(\delta) = 0.1 < q_{FB} = 0.5$ . Therefore reputation increases quality from  $\underline{q} = 0$  to  $q_{SB}(\delta) = 0.1$ , but it is not able to restore full efficiency since consumers must pay an informational rent to the producers.

To provide an additional interesting insight, we plug  $q_r(\delta)$ , as in (35), into (3) to get the value of welfare at the constrained optimum,  $W_r(\delta) \equiv q_r(\delta) - [q_r(\delta)]^2$ . In Figure 2 we depict  $W_r(\delta)$  as a function of  $n$  and of, for the sake of comparison,  $\delta = 0.5; 0.6; 0.8; 0.9$ . It is worth noting that  $W_r(\delta)$  is always decreasing in  $n$ . As a result, a larger value of the social standard  $\bar{q}$  affects positively the welfare because it commands an increase in the equilibrium quality  $q_{SB}$  and, according to Lemma 5, a reduction in the equilibrium number of active firms.

To conclude our analysis, we are interested in checking the robustness of the equilibrium results concerning high quality and firms' positive per-contract profits. To this aim, we investigate the following three extensions/modifications of our framework.

### (a) Private Signal

We generalize our framework by introducing a private signal about quality of the good. More precisely, we suppose that a fraction  $\beta \in (0, 1]$  of the clients cheated by firm  $i$  at time  $t$ ,  $\tau_{i,t}\sigma_{i,t}$ , receive a private signal on top of the public one, in which case they do not buy anymore from firm  $i$ . Two aspects of this formalization are worth remarking. (i) If no clients are cheated,  $\tau_{i,t} = 0$ , no private signal is conveyed because  $\beta\tau_{i,t}\sigma_{i,t} = 0$ . (ii)  $\beta = 1$  denotes a situation where all cheated clients get the signal, that is, they are able to perfectly observe the quality level after the contracts are implemented.

Our findings of Proposition 1 are robust to this richer specification because Lemma 6 below proves that the IC constraint (11) continues to hold true.

### Lemma 6

*When the private signal described above is received by the clients together with the public signal, firm  $i$  decides not to cheat any consumers if and only if the IC constraint (11) holds true.*

### Proof

We prove that the result of Lemma 3 is robust to a single-period deviation, that is, firm  $i$  setting  $\tau_i > 0$  at time  $t$  and  $\tau_i = 0$  from  $t + 1$  onward, when the private signal is taken into account. The discounted value of firm  $i$ 's profit at time  $t$ ,  $V_{i,t}$  in (10), becomes

$$Z_{i,t} \equiv \sigma_{i,t} \left[ p_{i,t} - c(q_{i,t}) + \tau_{i,t} \left( c(q_{i,t}) - c(q_{i,t}^A) \right) \right] + \delta [1 - \alpha(\tau_{i,t}, \sigma_{i,t})] Z_{i,t+1}, \quad (36)$$

with

$$Z_{i,t+1} \equiv (1 - \beta\tau_{i,t})\sigma_{i,t} [p_{i,t+1} - c(q_{i,t+1})] + \delta [1 - \alpha(0, (1 - \beta\tau_{i,t})\sigma_{i,t})] Z_{i,t+2}, \quad (37)$$



after setting  $\tau_i = 0$  from  $t+1$  onward. Note that firm  $i$ 's market share at  $t+1$ ,  $\sigma_{i,t+1}$ , is equal to  $(1 - \beta\tau_{i,t})\sigma_{i,t}$  for a fraction  $\beta\tau_{i,t}\sigma_{i,t}$  of customers leaves upon receiving the private signal.

One can check that  $V_{i,t} = Z_{i,t}$  if  $\tau_{i,t} = 0$  since no consumer receives the private signal. By contrast, if  $\tau_{i,t} > 0$ ,  $V_{i,t} - Z_{i,t}$  can be written as

$$V_{i,t} - Z_{i,t} = \delta[1 - \alpha(\tau_{i,t}, \sigma_{i,t})](V_{i,t+1} - Z_{i,t+1}), \quad (38)$$

where  $Z_{i,t+1}$  is given by (37) and

$$V_{i,t+1} = \sigma_{i,t}\{p_{i,t+1} - c(q_{i,t+1})\} + \delta[1 - \alpha(0, \sigma_{i,t})]V_{i,t+2}. \quad (39)$$

Note that  $Z_{i,t+2} = V_{i,t+2}$  since  $\tau_i = 0$  from  $t+1$  onward. Moreover,

$$\alpha(0, \sigma_{i,t}) = \alpha(0, (1 - \beta\tau_{i,t})\sigma_{i,t}) = 0 \quad (40)$$

according to Assumption 1. It follows that

$$V_{i,t+1} - Z_{i,t+1} = [p_{i,t+1} - c(q_{i,t+1})]\beta\tau_{i,t}\sigma_{i,t}, \quad (41)$$

which is positive. Hence  $V_{i,t} > Z_{i,t}$  at  $\tau_{i,t} > 0$ . Lemma 3 proves that  $V_{i,t}$  is maximized at  $\tau_{i,t} = 0$ . Since  $V_{i,t} = Z_{i,t}$  at  $\tau_{i,t} = 0$  and  $V_{i,t} > Z_{i,t}$  at  $\tau_{i,t} > 0$ , we can conclude that  $\tau_{i,t} = 0$  maximizes also  $Z_{i,t}$ . ■

The intuition for this result is straightforward. For any given fraction of cheated consumers, the probability that firms lose clients is greater when consumers receive an additional signal about quality. By contrast, if firm  $i$  behaves,  $\tau_{i,t} = 0$ , no private signal is conveyed, hence time- $t$  discounted value of firm  $i$ 's profit boils down to (10). As a result, any firm  $i$  behaves if and only if the IC constraint (11) is fulfilled, in which case the equilibrium results are as in Proposition 1. Remark that a different equilibrium notion should be adopted if we solved the repeated competition game of Section "Results" with both public and private signal. Since the firms' quality level can now be imperfectly observed also through a private signal, Perfect Bayesian Equilibrium, and not PPE, is the proper solution concept.

### (b) Relaxing Assumption 1

Assumption 1 states that non-cheated consumers cannot send signals of bad quality. We relax it by considering an alternative public signal probability,  $\phi(\tau_{i,t}, \sigma_{i,t})$ , where a positive probability of sending a signal of bad quality exists even if firm  $i$  does not cheat any client at time  $t$ , i.e.,  $\phi(0, \sigma_{i,t}) > 0$ . In that case, one can easily check that the IC constraint (11) must be rewritten as

$$p_i - c(q_i) \geq \Pi'_i \equiv \frac{\{1 - \delta[1 - \phi(0, \sigma_i)]\}[c(q_i) - c(\underline{q})]}{\delta\phi_\tau(0, \sigma_i)}. \quad (42)$$

At the equilibrium of the repeated competition game, where the new IC constraint (42) is binding, a finite number of firms is active in the market, their profits on each contract are positive, and the quality level is above the minimum thanks to the social convention, as stated by Proposition 1.

To see this, we rely on the numerical simulations introduced above and let  $\phi(\tau_{i,t}, \sigma_{i,t}) = [\tau_{i,t}\gamma + (1 - \gamma)]\sigma_{i,t}$ , with  $\gamma \in (0, 1)$ . Note that  $\phi(0, \sigma_{i,t}) = (1 - \gamma)\sigma_{i,t} > 0$ . Moreover,  $\phi_\tau = \gamma\sigma_{i,t} > 0$ ,  $\phi_{\tau\tau} = 0$ , and  $\phi_{\tau\sigma} = \gamma > 0$  in conformity with Assumptions 2 and 3. By

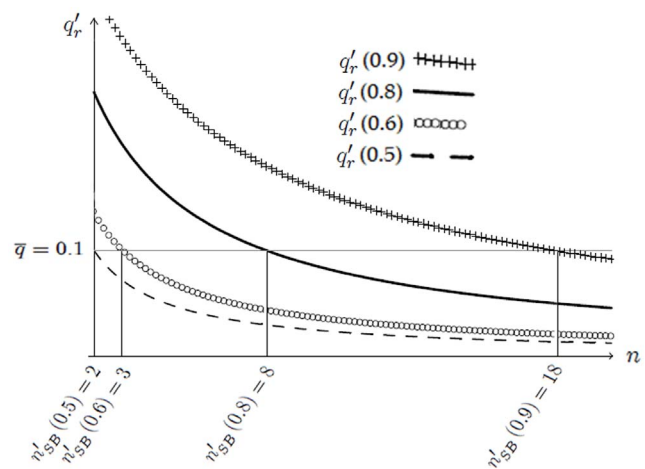

**Figure 3. Constrained optimal quality  $q'_r(\delta)$  as a function of the number  $n$  of active firms when false and/or erroneous signals of bad quality can be conveyed.** Quality  $q'_r(\delta)$  decreases for any  $\delta = 0.5, 0.6; 0.8; 0.9$  when new firms enter the market, as in Figure 1. Entry is blocked when quality reaches the social standard,  $\bar{q} = 0.1$  in the graph. Focus, e.g., on  $q'_r(0.6)$ , the constrained optimal quality when  $\delta = 0.6$ : only three firms can enter the market,  $n'_{SB}(0.6) = 3$ , because a fourth competitor would supply lower quality than 0.1. doi:10.1371/journal.pone.0110233.g003

letting, e.g.,  $\gamma = \frac{1}{2}$ , one can easily check that the IC constraint of Lemma 3 becomes

$$p_i - q_i^2 \geq \Pi'_i \equiv \frac{[2 - \delta(2 - \sigma_i)]}{\delta\sigma_i} q_i^2. \quad (43)$$

In that case, the optimal stationary contract computed in Lemma 4 can be rewritten as

$$\{q'_r, p'_r\} = \left\{ \frac{1}{2} \frac{\delta\sigma_i}{2 - \delta(2 - \sigma_i)}, \frac{1}{4} \frac{\delta\sigma_i}{2 - \delta(2 - \sigma_i)} \right\}. \quad (44)$$

In Figure 3 we present the constrained optimal quality,

$$q'_r(\delta) = \frac{1}{2} \frac{\delta \frac{1}{n}}{2 - \delta \left( 2 - \frac{1}{n} \right)}, \quad (45)$$

as a function of the number  $n$  of active firms and of  $\delta = 0.5; 0.6; 0.8; 0.9$ . Note that interval  $\left( \underline{q}, q'_r \left( \delta; \frac{1}{2} \right) \right]$  introduced in Definition 1 can be rewritten as  $\left( 0, \frac{\delta}{2(4 - 3\delta)} \right]$ , with  $\frac{\delta}{2(4 - 3\delta)}$  increasing in  $\delta$  and equal to 0.1; 0.14; 0.25; 0.35 for  $\delta = 0.5; 0.6; 0.8; 0.9$ , respectively. Accordingly, we let the socially accepted quality standard  $\bar{q}$  be still equal to  $0.1 \in (0, 0.1]$ .

Figure 3 confirms the result of Lemma 5:  $q'_r(\delta)$  decreases with  $n$ . Recalling that  $\bar{q} = 0.1 \in (0, 0.1]$ , one can check that the equilibrium number of firms is  $n'_{SB}(\delta) = 2; 3; 8; 18$  for  $\delta = 0.5; 0.6; 0.8; 0.9$ . As a result, (i) the quality level is higher than the minimum,  $q'_{SB}(\delta) = 0.1$  for any  $\delta = 0.5; 0.6; 0.8; 0.9$ , (ii) firms'

per-contract profits are positive,  $\Pi_{SB}(\delta) = \left[ 2 - \delta \left( 2 - \frac{1}{n_{SB}} \right) \right]$   
 $q_{SB}^2 / \left( \delta \frac{1}{n_{SB}} \right) = \frac{1}{20}$ . One can also check that  $q_r'(\delta) < q_r(\delta)$  for  
 any given  $\delta$  and  $n$ : when non-cheated consumers may send signals  
 of bad quality, the firms offer lower quality. This is because their  
 profits are negatively affected by the increased probability that the  
 signal is transmitted.

### (c) Relaxing Assumption 3

Assumption 3 states that bigger firms are more easily discovered  
 when they cheat. We relax it by considering an alternative public  
 signal probability,  $\eta(\tau_{i,t}, \sigma_{i,t})$ , with  $\eta_{\tau\sigma} < 0$ : smaller firms are more  
 easily discovered when they cheat. In that case, the result of  
 Lemma 5 reverses in that quality level  $q_r$  becomes decreasing in  
 market share  $\sigma_i$ . Put differently, quality is increased by entry of  
 new firms. Entry is thus not blocked by the existence of a social  
 convention with the effect that a huge number of firms is active in  
 the market, i.e.,  $\sigma_i \rightarrow 0$  for any firm  $i$ . At the equilibrium of our  
 repeated competition game, where the following new IC constraint  
 is binding,

$$p_i - c(q_i) \geq \Pi_i' \equiv \frac{(1-\delta)[c(q_i) - c(\bar{q})]}{\delta \eta_{\tau}(0, \sigma_i)}, \quad (46)$$

the quality level is greater than the minimum,  $\bar{q}$ , and firms get  
 positive profits since both the numerator and the denominator of  
 $\Pi_i'$  are positive when  $\sigma_i \rightarrow 0$ .

Again we resort to the above numerical simulation to illustrate  
 this result and we let  $\eta(\tau_{i,t}, \sigma_{i,t}) = \frac{\tau_{i,t}}{1 + \sigma_{i,t}}$ . Note that  $\eta_{\tau\sigma} =$   
 $-(1 + \sigma_{i,t})^{-2} < 0$ . Moreover,  $\eta(0, \sigma_{i,t}) = 0$ ,  $\eta_{\tau} = (1 + \sigma_{i,t})^{-1} > 0$ ,  
 and  $\eta_{\tau\tau} = 0$  in conformity with Assumptions 1 and 2. One can  
 easily check that the IC constraint of Lemma 3 becomes

$$p_i - q_i^2 \geq \Pi_i' \equiv \frac{(1-\delta)(1 + \sigma_i)q_i^2}{\delta} \quad (47)$$

and that the optimal contract of Lemma 4, can be rewritten as

$$\{q_r'', p_r''\} = \left\{ \frac{1}{2} \frac{\delta}{1 + \sigma_i(1-\delta)}, \frac{1}{4} \frac{\delta}{1 + \sigma_i(1-\delta)} \right\}. \quad (48)$$

In Figure 4 we present the constrained optimal quality

$$q_r''(\delta) = \frac{1}{2} \frac{\delta}{1 + \frac{1}{n}(1-\delta)}$$

as a function of the number  $n$  of active firms and of  
 $\delta = 0.5; 0.6; 0.8; 0.9$ . For the sake of comparison, we let the  
 socially accepted quality standard  $\bar{q}$  be still equal to 0.1.

Quality  $q_r''(\delta)$  increases with  $n$ : the result of Lemma 5 reverses,  
 as stated above. Since entry is not blocked by the existence of a

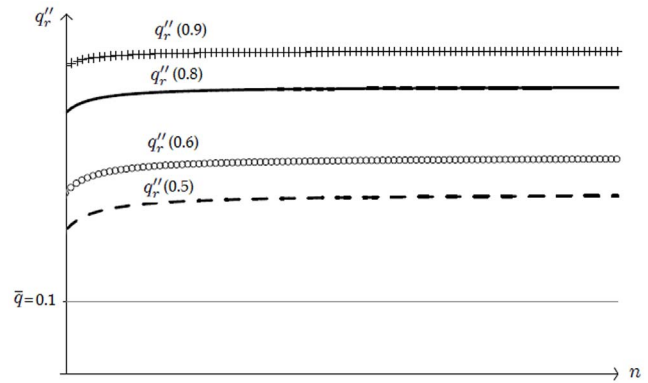

**Figure 4. Constrained optimal quality  $q_r''(\delta)$  as a function of the number  $n$  of active firms when smaller firms are more easily discovered upon cheating.** Quality  $q_r''(\delta)$  increases for any  $\delta = 0.5, 0.6; 0.8; 0.9$  when new firms enter the market, unlike the scenarios described in Figures 1 and 3. As a result, the equilibrium level of quality is higher than the minimum.  
 doi:10.1371/journal.pone.0110233.g004

social standard on quality, the equilibrium number of firms is  
 $n_{SB}'' \rightarrow \infty$ . At the equilibrium described by Proposition 1, (i) the  
 quality level is thus higher than the minimum,  $q_{SB}''(\delta) \rightarrow$   
 $q_r''\left(\delta; \frac{1}{\infty}\right) = \lim_{n \rightarrow \infty} \frac{1}{2} \frac{\delta}{1 + \frac{1}{n}(1-\delta)} = \frac{\delta}{2}$ , (ii) firms' per-contract  
 profits are positive,  $\Pi_{SB}'' = \left\{ \left[ (1-\delta) \left( 1 + \frac{1}{n_{SB}''} \right) \right] / \delta \right\} (q_{SB}'')^2 =$   
 $\frac{(1-\delta)\delta}{4}$ .

A major lesson comes from the three above extensions. The  
 equilibrium results of high quality and firms' positive profits are  
 robust to the introduction of a private signal about quality and to  
 alternative specifications of the public signal probability.

## Conclusion

In this paper we tackled the issue of non-contractible quality  
 provided by competitive symmetric firms. Consumers infer future  
 levels of quality both from past levels and from current prices. We  
 initially characterized the equilibrium contract in a static context  
 and then showed that firms have no incentive to provide high  
 quality. We then introduced reputation and demonstrated that  
 firms end up with positive profits and supply high-quality goods.  
 This provides a simple solution to the important objection raised  
 by Joseph Stiglitz [7]. We finally proved that our results are robust  
 to three different modifications of the framework.

## Acknowledgments

The usual disclaimer applies. We thank two anonymous reviewers and  
 seminar audience at Università Cattolica del Sacro Cuore, Milan, Italy, for  
 useful comments.

## Author Contributions

Conceived and designed the experiments: AF PT. Analyzed the data: AF  
 PT. Wrote the paper: AF PT.

## References

- Bar-Isaac H, Tadelis S (2008) Seller Reputation. *Foundations and Trends in Microeconomics* 4 (4): 273–351.
- Kreps DM, Wilson R (1982) Reputation with Imperfect Information. *Journal of Economic Theory* 27: 253–279.

3. Wang Z, Wang L, Yin ZY, Xia CY (2012) Inferring Reputation Promotes the Evolution of Cooperation in Spatial Social Dilemma Games. *PLoS ONE* 7(7): e40218.
4. Klein B, Leffler K (1981) The Role of Market Forces in Assuring Contractual Performance. *Journal of Political Economy* 81: 615–641.
5. Shapiro C (1983) Premiums for High Quality Products as Rents to Reputation. *Quarterly Journal of Economics* 98: 659–680.
6. Allen F (1984) Reputation and Product Quality. *RAND Journal of Economics* 15 (3): 311–327.
7. Stiglitz JE (1989) Imperfect Information in the Product Market in Richard Schmalensee and Robert Willig (eds.). *Handbook of industrial organization*, vol. 1, Amsterdam: Elsevier Science Publishers, 771–847.
8. Hörner J (2002) Reputation and Competition. *American Economic Review* 9: 644–663.
9. Tadelis S (2002) The Market for Reputations as an Incentive Mechanism. *Journal of Political Economy* 110 (4): 854–882.
10. Toth A (2012) The Great Industry Gamble: Market Structure Dynamics as a Survival Contest. *RAND Journal of Economics* 43 (2): 348–367.
11. Kranton RE (2003) Competition and the Incentive to Produce High Quality. *Economica* 70: 385–404.
12. Rob R, Fishman A (2005) Is Bigger Better? Consumer Base Expansion through Word-of-Mouth Reputation. *Journal of Political Economy* 113: 1146–1162.
13. Dana JD, Fong YF (2011) Product quality, Reputation, and Market Structure. *International Economic Review* 52 (4): 1059–1076.
14. Bar-Isaac H (2005) Imperfect Competition and Reputational Commitment. *Economics Letters* 89 (2): 167–173.
15. Atiase RK (1985) Predisclosure Information, Firm Capitalization, and Security Price Behavior Around Earnings Announcements. *Journal of Accounting Research* 23 (1): 21–36.
16. Bamber LS (1987) Unexpected Earnings, Firm Size, and Trading Volume around Quarterly Earnings Announcements. *Accounting Review* 62 (3): 510–532.
17. Bushan R (1989) Firm Characteristics and Analyst Following. *Journal of Accounting and Economics* 11 (2–3): 255–274.
18. Raju JS, Roy A (2000) Market Information and Firm Performance. *Management Science* 46 (8): 1075–84.
19. Economist Intelligence Unit (2005) Reputation: Risk of risks. *Economist Intelligence Unit's Global Risk Briefing*.
20. Brand R (2000) The Future of UK Insurance. *Business Insights*, London.
